# Supplementary material for: 3D printed composites from heat extruded polycaprolactone/sodium alginate filaments and their heavy metal adsorption properties
Source: Royal Society of Chemistry journal article supplement (doi:10.1039/d0qm00159g), 2020-01-01
Supplement: d0qm00159g1.pdf [file d0qm00159g1.pdf]

### Supporting information

**Title:** 3D printed composites from heat extruded polycaprolactone / sodium alginate filaments and their heavy metal adsorption properties

Ioannis L. Liakos<sup>1\*</sup>, Alessio Mondini<sup>1</sup>, Emanuela Dell Dottore<sup>1</sup>, Carlo Filippeschi<sup>1</sup>, Francesca Pignatelli<sup>1</sup>, Barbara Mazzolai<sup>1\*</sup>

<sup>1</sup>*Center for Micro-BioRobotics, Istituto Italiano di Tecnologia (IIT), Viale Rinaldo Piaggio 34, Pontedera (Pisa) 56025 – Italy*

\* Corresponding authors: [ioannis.liakos@iit.it](mailto:ioannis.liakos@iit.it), [barbara.mazzolai@iit.it](mailto:barbara.mazzolai@iit.it)

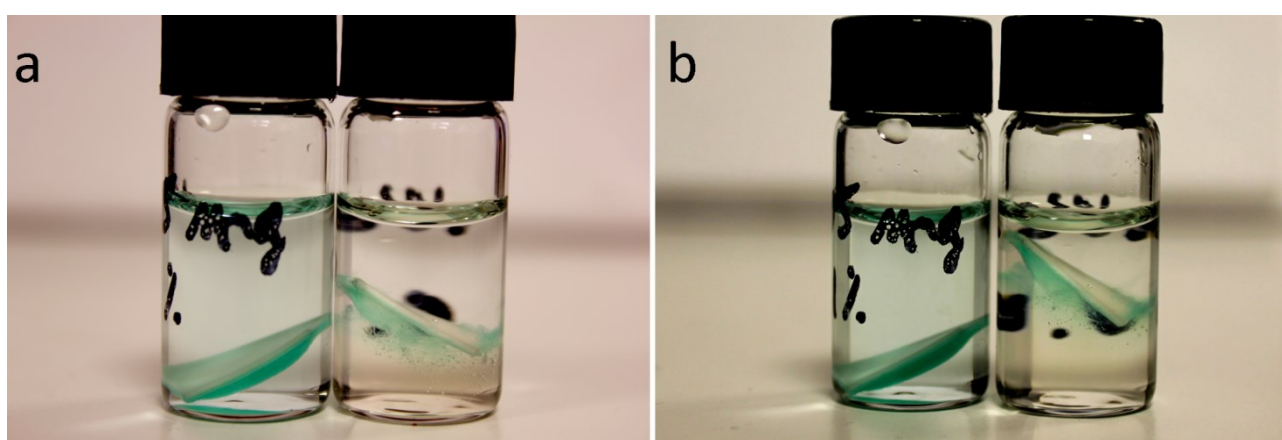

Figure S1. (a) PCL/30%SA film immersed for 6 h in 1% (left vial) and 0.17% w/w (right vial) Cu<sub>2</sub>SO<sub>4</sub> solution and (b) PCL/30%SA film immersed for 1 day in 1% (left vial) and 0.17% w/w (right vial) Cu<sub>2</sub>SO<sub>4</sub> solution.

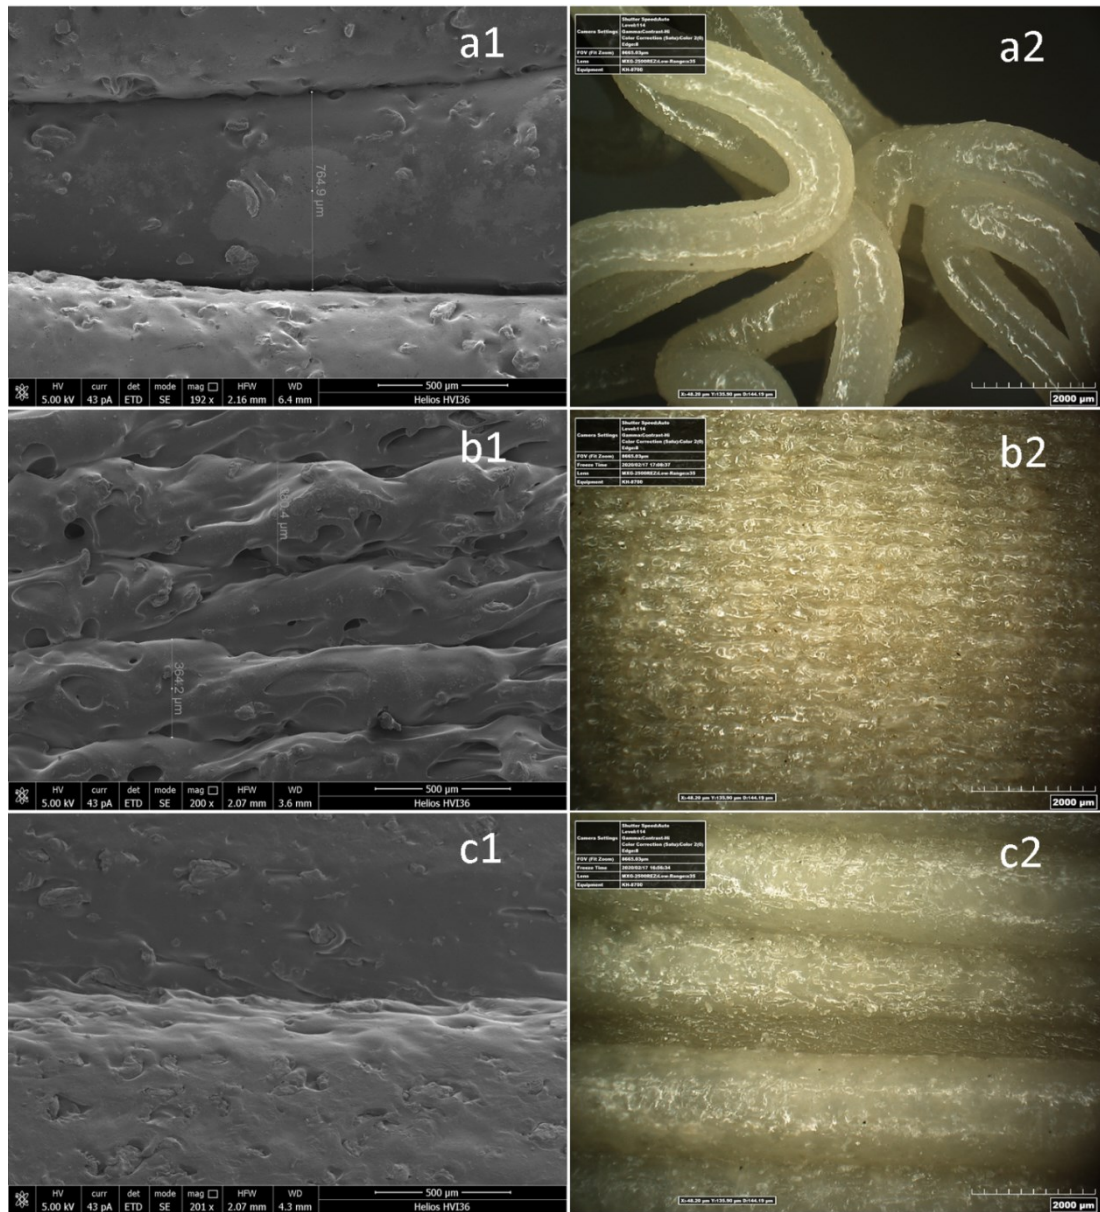

Figure S2. SEM and optical microscopy images of 3D printed objects using PCL/15%SA feeding filament for (a1 & a2) 3D pen; (b1 & b2) FDM 3D printer and (c1 & c2) growing robot respectively.

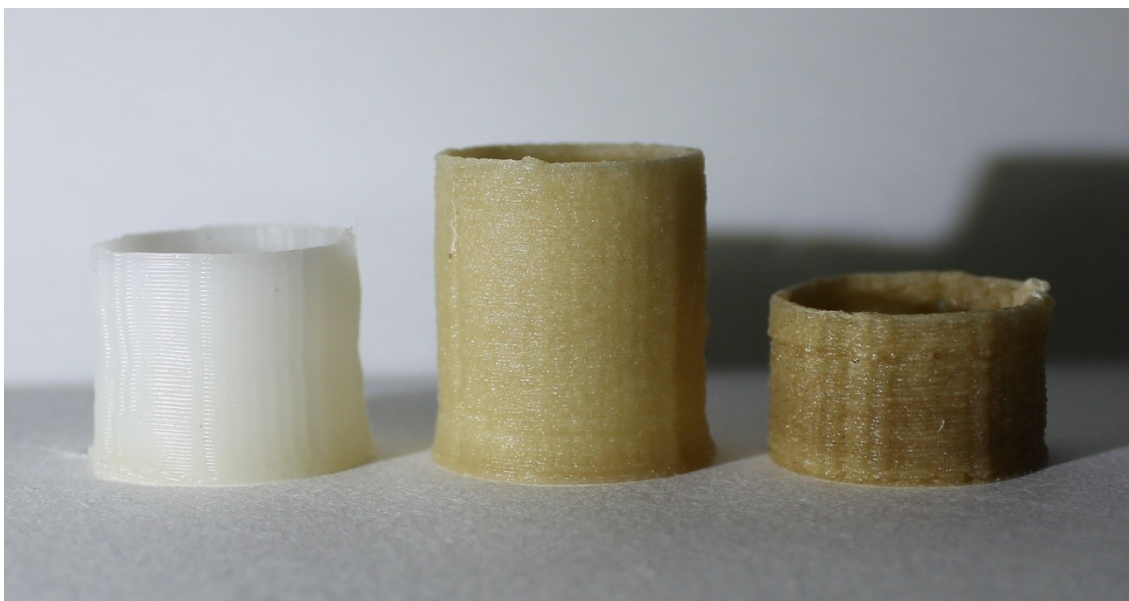

Figure S3. From left to right PCL/5, 15 & 30%SA FDM 3D printed tubes.

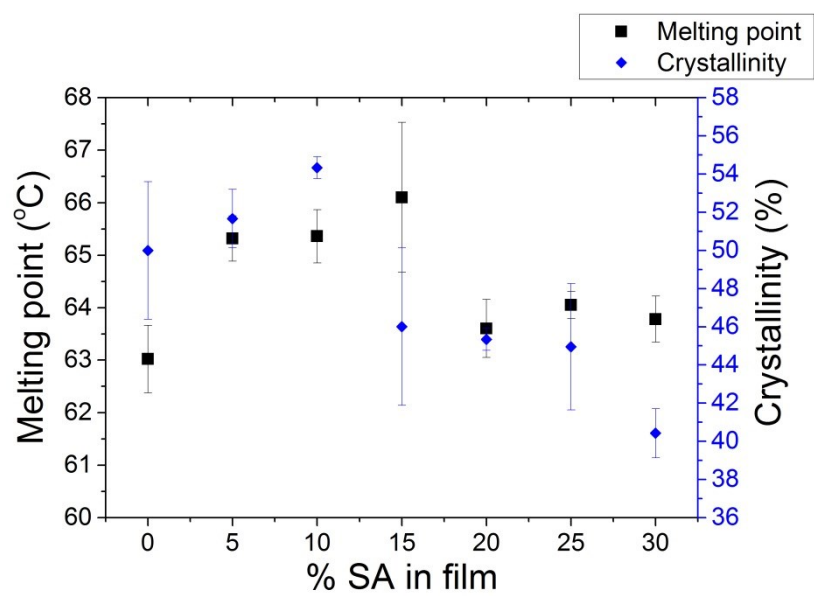

Figure S4. Melting point and % crystallinity of PCL/SA films

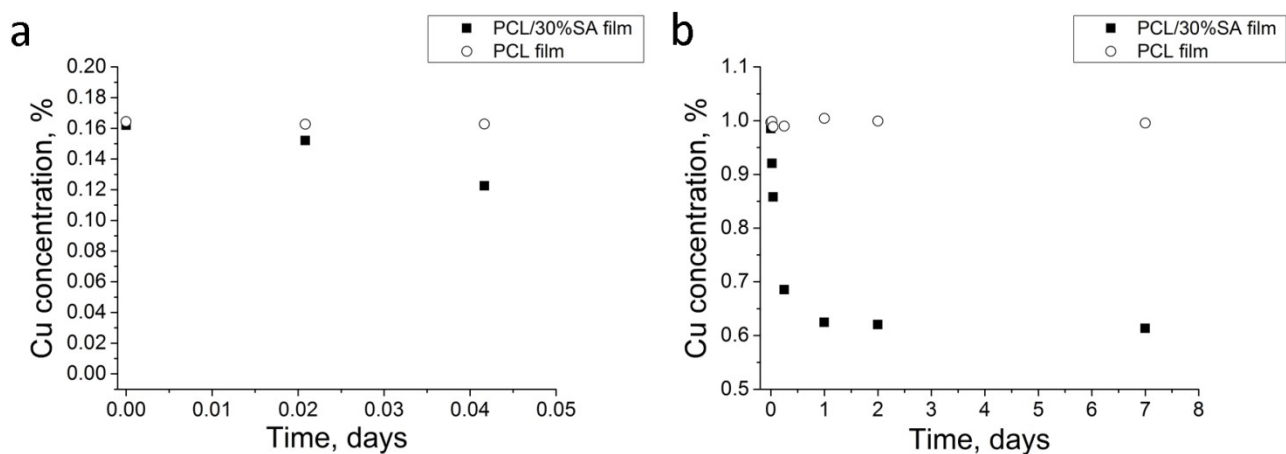

Figure S5. Kinetics of % concentration of  $\text{Cu}_2\text{SO}_4$  vs immersion time of PCL/30%SA film in (a) 3 ml of 0.17% w/w  $\text{Cu}_2\text{SO}_4$  solution and (b) in 3 mL of 1% w/w  $\text{Cu}_2\text{SO}_4$  solution.

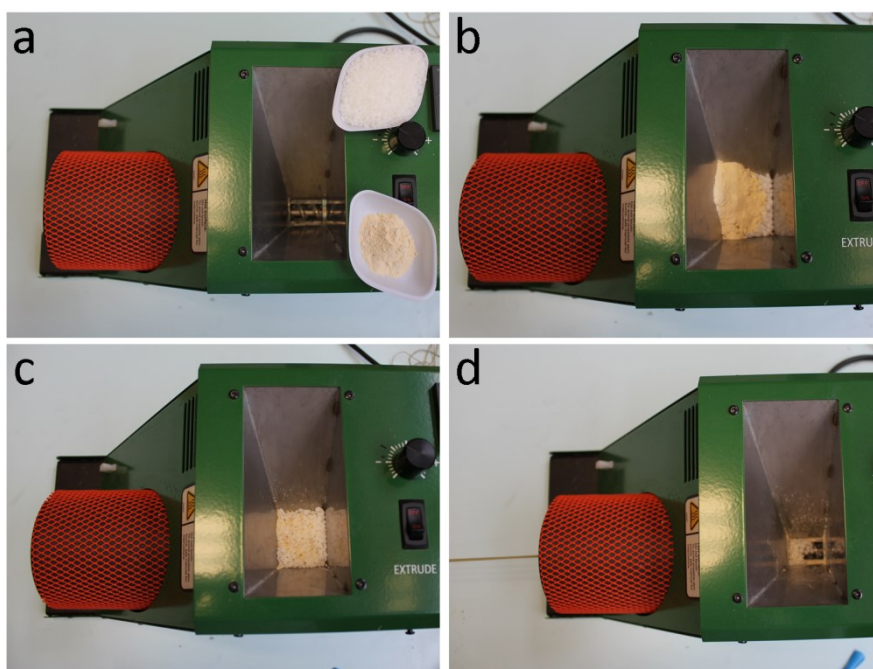

Figure S6. (a-c) Directly mixing PCL pellets with SA powder in the heat extruder and (d) filament extruded from the PCL and SA mixing.



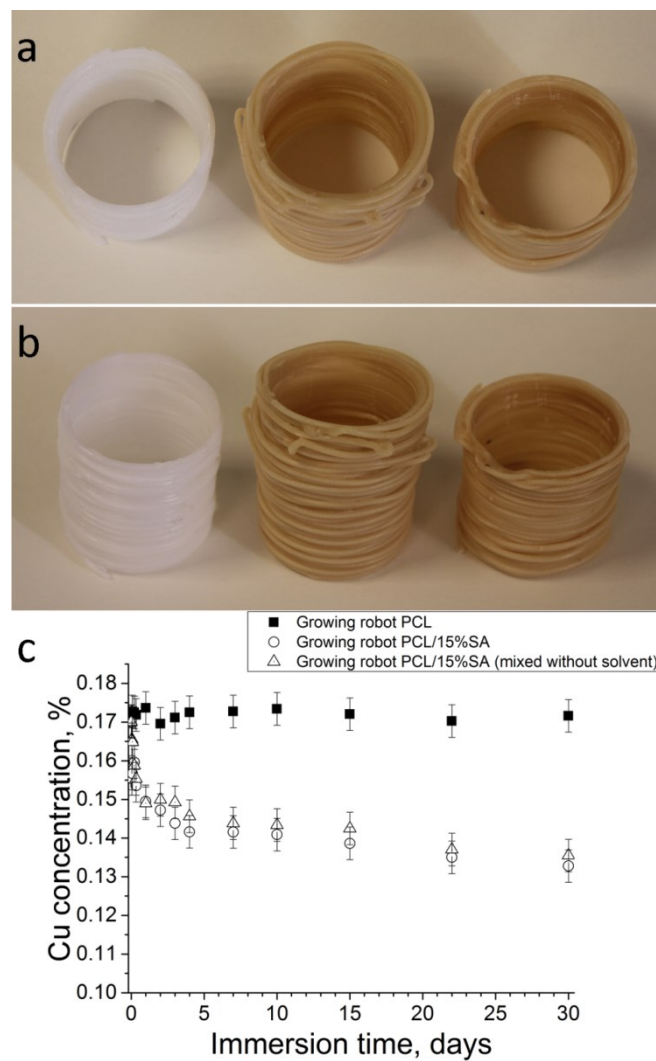

Figure S7. (a, b) Photographs of 3D Growing robot printed structures of PCL, PCL/15%SA and PCL/15%SA (originated from a filament made without the use of DCM solvent) from left to right; and (c) % of Cu concentration reduction of the above 3D Growing robot printed structures (100 mg) in 6 mL of 0.17% w/w  $\text{Cu}_2\text{SO}_4$  solution. (The misaligned layers on the top of the PCL/15%SA structures (a and b) where due to the change printing direction to obtain a starting curve).
